# Supplementary material for: A CRISPR–Cas12a amplified RNase activity sensor powered by gold nanoparticle–barcode DNA multipliers
Source: Royal Society of Chemistry journal article supplement (doi:10.1039/d6ma00316h), 2026-04-02
Supplement: d6ma00316h1.pdf [file d6ma00316h1.pdf]

## Supporting Information

### CRISPR-Cas12a Amplified RNase Activity Sensor Powered by Gold Nanoparticle–Barcode DNA Multipliers

Sathishkumar Munusamy, Rana Jahani, Jun Chen, Shuo Zhou, Juanhua Kong, Haiyan Zheng\*,  
and Xiyun Guan\*

#### Author affiliation:

Department of Chemistry, University of Missouri, Columbia, MO 65211, USA

\*Corresponding Author E-mails: haiyanzheng1111@gmail.com and xgpc2@missouri.edu

#### Table of Contents:

|                                                                                                                           |     |
|---------------------------------------------------------------------------------------------------------------------------|-----|
| <b>Figure S1.</b> Quantification of oligonucleotide loading on AuNPs.....                                                 | S-2 |
| <b>Figure S2.</b> Zeta potential of streptavidin-coated magnetic beads before and after AuNP conjugation.....             | S-3 |
| <b>Figure S3.</b> Stability study of the prepared SB-MAC assemblies.....                                                  | S-4 |
| <b>Figure S4.</b> Reproducibility study of the DNA-assisted CRISPR-Cas12a sensing platform.....                           | S-5 |
| <b>Figure S5.</b> Relationship between fluorescence intensity and of RNase A concentration.....                           | S-6 |
| <b>Table S1.</b> Performance comparison of the developed RNase activity assay with other reported detection methods ..... | S-7 |

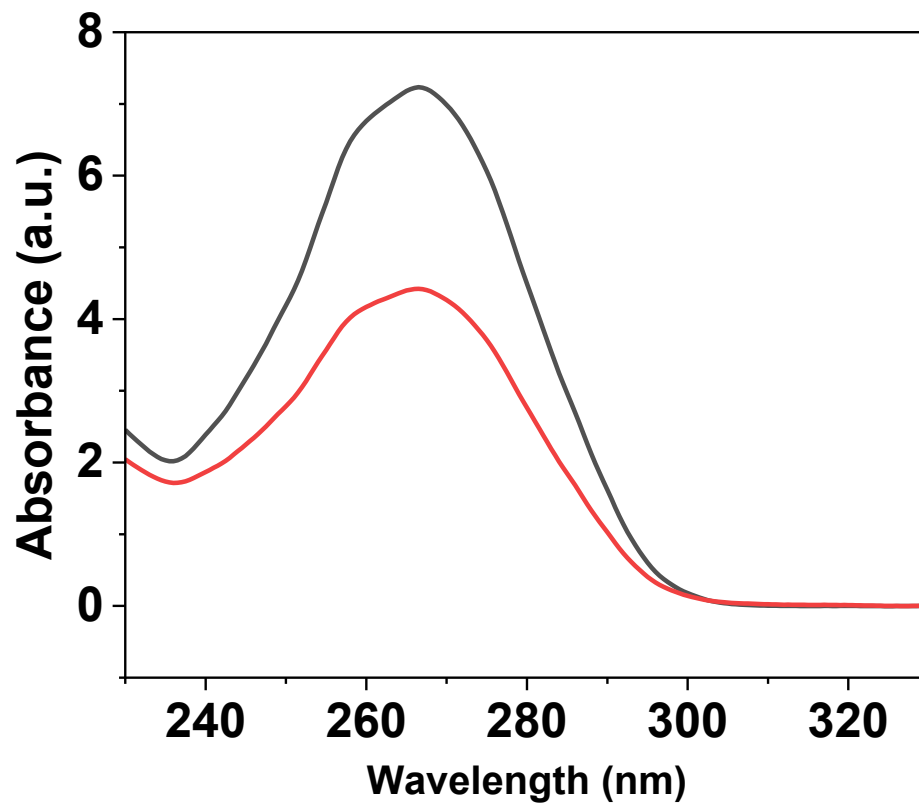

**Figure S1.** Quantification of oligonucleotide loading on AuNPs by UV-vis. The black absorption spectrum referred to the free oligonucleotide solution before AuNPs modification, while the red one corresponded to the supernatant collected after centrifugation of the AuNP-oligonucleotide conjugates. The amount of oligonucleotide immobilized on the AuNP surface was determined based on the difference in the absorbance between the supernatant and the control.

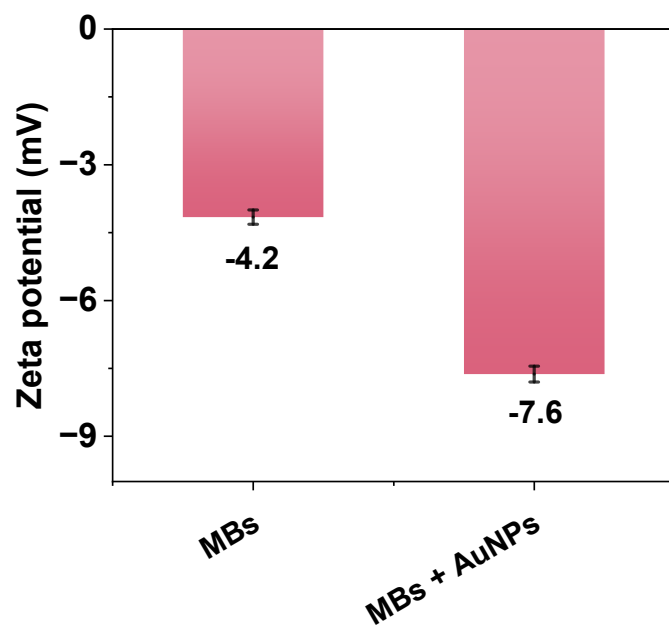

**Figure S2.** Zeta potential of streptavidin-coated magnetic beads (MBs) before and after conjugation with nucleic acid-functionalized AuNPs, confirming successful SB-MAC assembly via biotin–streptavidin interaction.



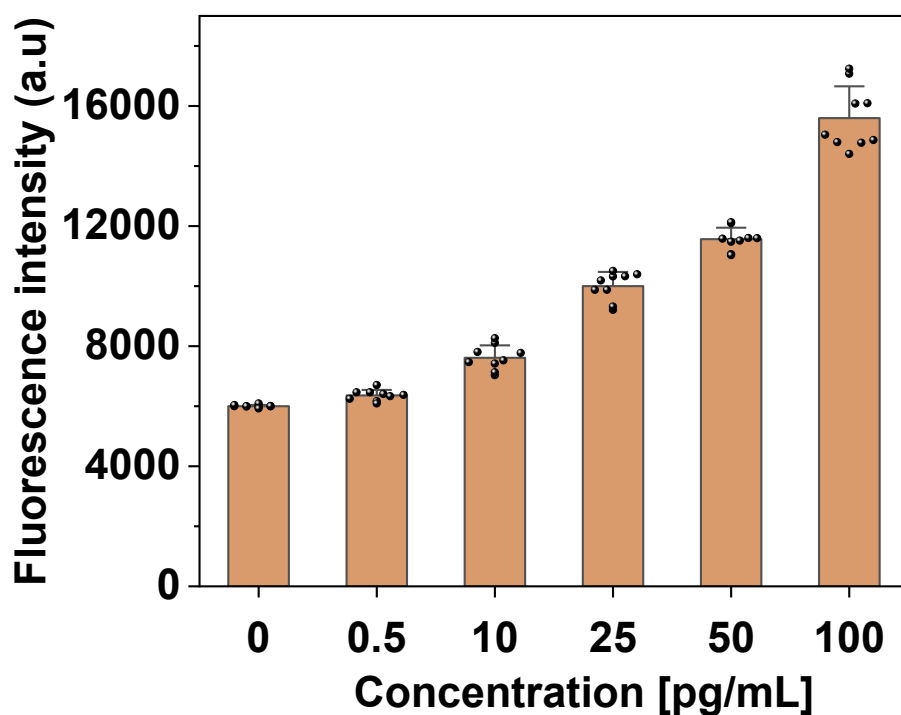

**Figure S4.** Reproducibility study of the DNA-assisted CRISPR-Cas12a sensing platform for RNase A detection. The error bars indicate the average and standard deviation values derived from results obtained in nine independent experiments ( $n = 9$ ), encompassing both batch-to-batch and day-to-day variability.

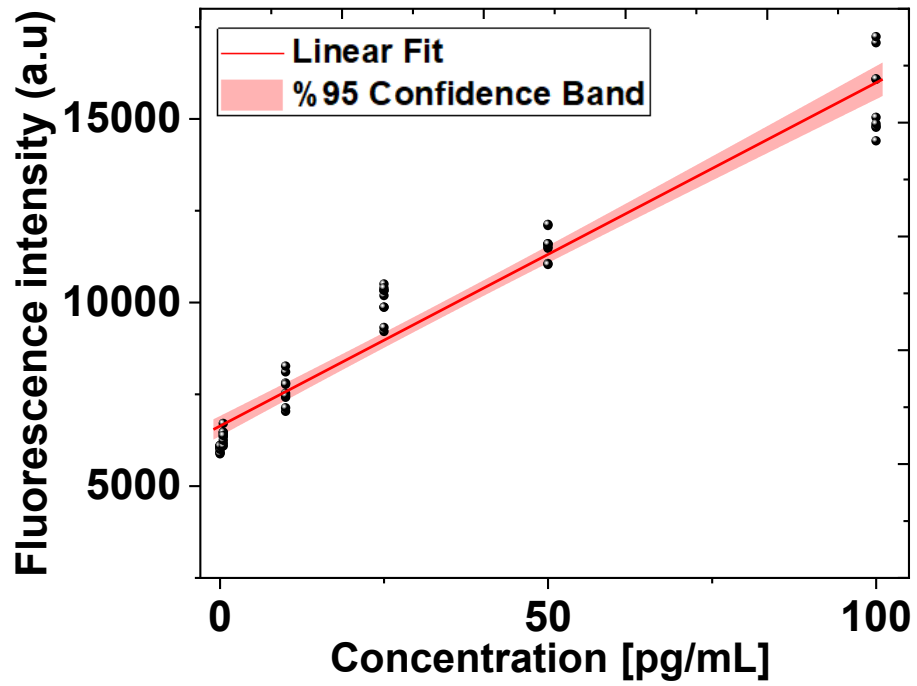

Figure S5. Relationship between fluorescence intensity and RNase A concentration.

**Table S1.** Performance comparison of the developed RNase activity assay with other reported detection methods

| Materials                                                                               | Methods                                | LOD (pg/mL) | Ref.                              |
|-----------------------------------------------------------------------------------------|----------------------------------------|-------------|-----------------------------------|
| Reduced graphene oxide (rGO)                                                            | Fluorescence                           | 50          | [1]                               |
| A Ru(bpy) <sub>3</sub> <sup>2+</sup> -labeled rU-containing chimeric DNA probe          | Electrochemiluminescence               | 0.2         | [2]                               |
| Au nanoparticles/SnO <sub>2</sub> /ZnIn <sub>2</sub> S <sub>4</sub>                     | Photoelectrochemical / electrochemical | 0.2         | [3]                               |
| Thioflavin T                                                                            | luminescence                           | 24.7        | [4]                               |
| rGO–DNAzyme                                                                             | Fluorescence                           | 89          | [5]                               |
| Tetrahedral DNA nanoprobe                                                               | Fluorescence                           | 90          | [6]                               |
| Fe <sub>3</sub> O <sub>4</sub> /multi-walled carbon nanotubes/SiO <sub>2</sub> -surface | Chemiluminescence                      | 0.32        | [7]                               |
| Electrode immobilized with a ferrocenyl cytidine-DNA probe                              | Electrochemical                        | 10          | [8]                               |
| Styryl dye                                                                              | Fluorescence                           | 2.87        | [9]                               |
| Dual functionalized gold nanoparticles                                                  | Fluorescence                           | 0.16        | The sensor developed in this work |

## References

- [1] C. Tong, C. Zhao, B. Liu, B. Li, Z. Ai, J. Fan, W. Wang, Sensitive detection of RNase A activity and collaborative drug screening based on rGO and fluorescence probe, *Anal. Chem.* 90 (2018) 2655–2661. <https://doi.org/10.1021/acs.analchem.7b04429>.
- [2] J. Ni, H. Lin, W. Yang, Y. Liao, Q. Wang, F. Luo, L. Guo, B. Qiu, Z. Lin, Homogeneous electrochemiluminescence biosensor for the detection of RNase A activity and its inhibitor, *Anal. Chem.* 91 (2019) 14751–14756. <https://doi.org/10.1021/acs.analchem.9b04194>.
- [3] Y. Ying, M. Zhou, S. Dai, M. Ma, W. Deng, Y. Tan, Q. Xie, Au nanoparticles/SnO<sub>2</sub>/ZnIn<sub>2</sub>S<sub>4</sub>-based biosensor for photoelectrochemical/electrochemical dual-signal detection of RNase A by combining the enzymolysis of DNA probe and the generation of molybdophosphate precipitate, *Sens. Actuators B Chem.* 354 (2022) 131251. <https://doi.org/10.1016/j.snb.2021.131251>.
- [4] J. Du, Y. Dong, H. Liu, L. Gong, S. Lu, C. Yang, Y. Li, Thioflavin T as luminescence biosensors for nucleic acid study and RNase A activity detection, *Microchem. J.* 147 (2019) 842–847. <https://doi.org/10.1016/j.microc.2019.04.008>.
- [5] Y. Qin, Y. Long, T. Zhou, R. Luo, C. Tong, Q. Xie, W. Wang, B. Liu, A rGO–DNAzyme assisted fluorescence method for sensitive RNase A activity assay and natural compound screening, *Anal. Methods* 13 (2021) 4298–4306. <https://doi.org/10.1039/D1AY01053K>.
- [6] C. Tong, Y. Hu, Q. Xie, T. Zhou, J. Fan, Y. Qin, B. Liu, W. Wang, Sensitive RNase A detection and intracellular imaging using a natural compound-assisted tetrahedral DNA nanoprobe, *Chem. Commun.* 56 (2020) 3229–3232. <https://doi.org/10.1039/D0CC00284D>.

- [7] H. Duan, L. Li, X. Wang, Y. Wang, J. Li, C. Luo, Biorecognition and highly sensitive determination of Ribonuclease A with chemiluminescence sensor based on Fe<sub>3</sub>O<sub>4</sub>/multi-walled carbon nanotubes/SiO<sub>2</sub>-surface molecular imprinting polymer, *RSC Adv.* 5 (2015) 18850–18857. <https://doi.org/10.1039/C4RA16878J>.
- [8] S. Sato, S. Takenaka, Electrochemical RNase A detection using an electrode with immobilized ferrocenyl deoxyribooligonucleotide containing cytidine residue, *Electroanalysis* 25 (2013) 1652–1658. <https://doi.org/10.1002/elan.201300126>.
- [9] J. Du, H. Yang, N. Huang, Y. Dong, Q. Gao, W. Yang, B. Liu, C. Yang, Highly sensitive and selective RNase A recognition systems based on “OFF – ON – OFF” fluorescence probes, *Sens. Actuators B Chem.* 259 (2018) 282–288. <https://doi.org/10.1016/j.snb.2017.12.072>.
